# Supplementary material for: A combinatorial cell-laden gel microarray for inducing osteogenic differentiation of human mesenchymal stem cells
Source: PubMed Central journal article supplement — Sci Rep. 2014 Jan 29;4:3896. doi: 10.1038/srep03896 (PMC3905276; doi:10.1038/srep03896), 2014-01-29
Supplement: srep03896-s1.pdf [file srep03896-s1.pdf]

# **A combinatorial cell-laden gel microarray for inducing osteogenic differentiation of human mesenchymal stem cells**

*Alireza Dolatshahi-Pirouz<sup>1,2,3,4</sup>, Mehdi Nikkhah<sup>2,3</sup>, Akhilesh K. Gaharwar<sup>1,2,3,5</sup>, Basma Hashmi<sup>1,6,7</sup>, Enrico Guermani<sup>2,3</sup>, Hamed Aliabadi<sup>2,3</sup>, Gulden Camci-Unal<sup>2,3</sup>, Thomas Ferrante<sup>1</sup>, Morten Foss<sup>4</sup>, Donald E. Ingber<sup>1,6,7</sup>, Ali Khademhosseini<sup>1,2,3,\*</sup>*

<sup>1</sup>Wyss Institute for Biologically Inspired Engineering, Harvard University, Boston, MA 02115, USA.

<sup>2</sup>Center for Biomedical Engineering, Department of Medicine, Brigham and Women's Hospital, Harvard Medical School, Boston, MA 02139, USA.

<sup>3</sup>Harvard-MIT Division of Health Sciences and Technology, Massachusetts Institute of Technology, Cambridge, MA 02139, USA.

<sup>4</sup>Interdisciplinary Nanoscience Center (iNANO), Aarhus University, Aarhus, Denmark.

<sup>5</sup>David H. Koch Institute of Integrative Cancer Research, Massachusetts Institute of Technology, Cambridge, MA 02139, USA.

<sup>6</sup>School of Engineering and Applied Sciences, Harvard University, Cambridge, MA 02138, USA.

<sup>7</sup>Vascular Biology Program, Departments of Pathology and Surgery, Children's Hospital Boston and Harvard Medical School, Boston, MA 02115, USA.

CORRESPONDING AUTHOR:

Ali Khademhosseini ([alik@rics.bwh.harvard.edu](mailto:alik@rics.bwh.harvard.edu)).

## Supplementary Figures

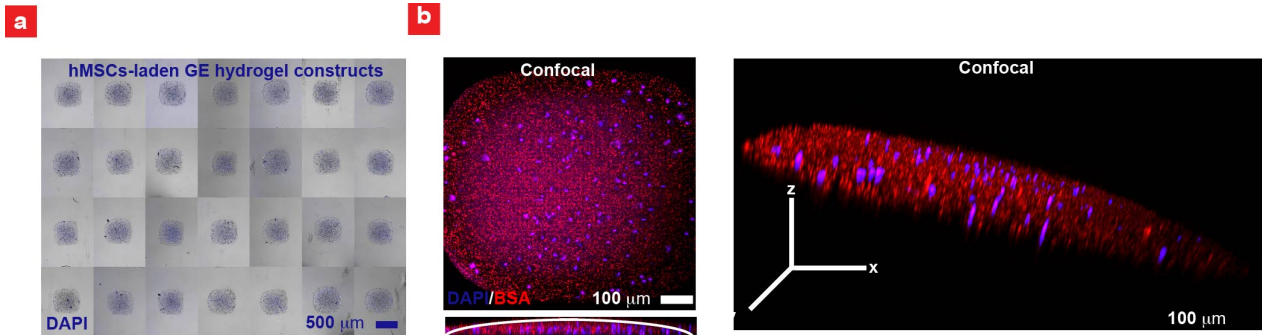

**Supplementary Figure 1:** Cell distribution within miniaturized hydrogel constructs. **(a)** Representative bright field images of printed gelatin methacrylated (GE) hydrogels embedded with hMSCs after 1 day of culture. The cell nuclei of the hMSCs was stained with DAPI. **(b)** Confocal images of stained hMSC-laden GE microgels ) along with cross-sectional views.

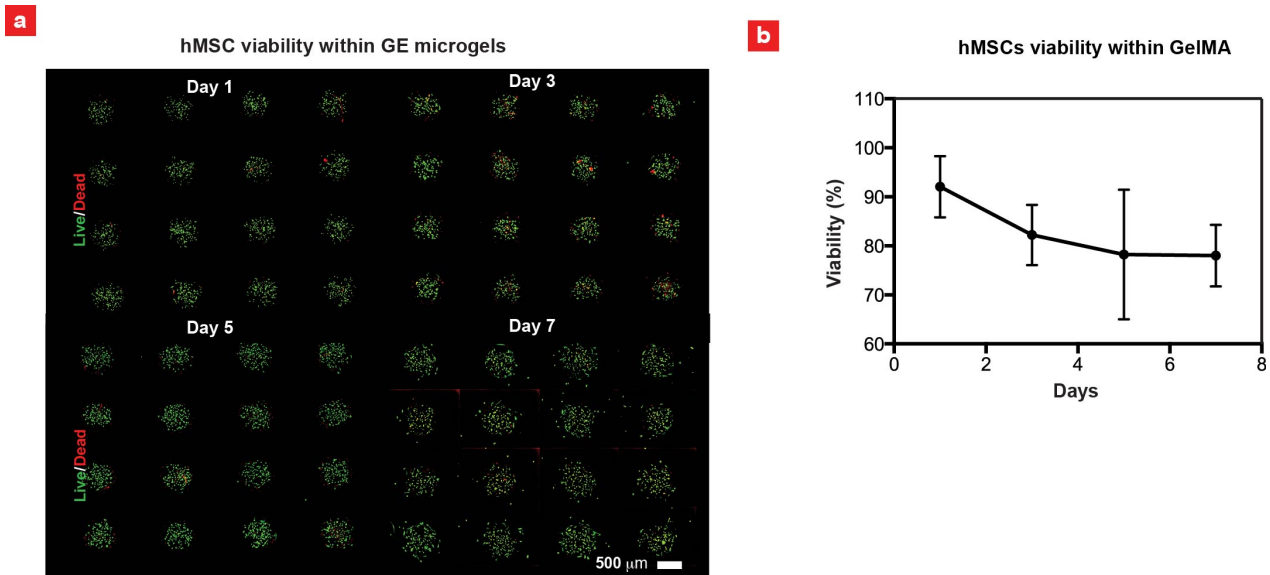

**Supplementary Figure 2:** (a) Representative florescence images along with (b) quantified data showing hMSCs viability within GE microgels after 7 days of culture.

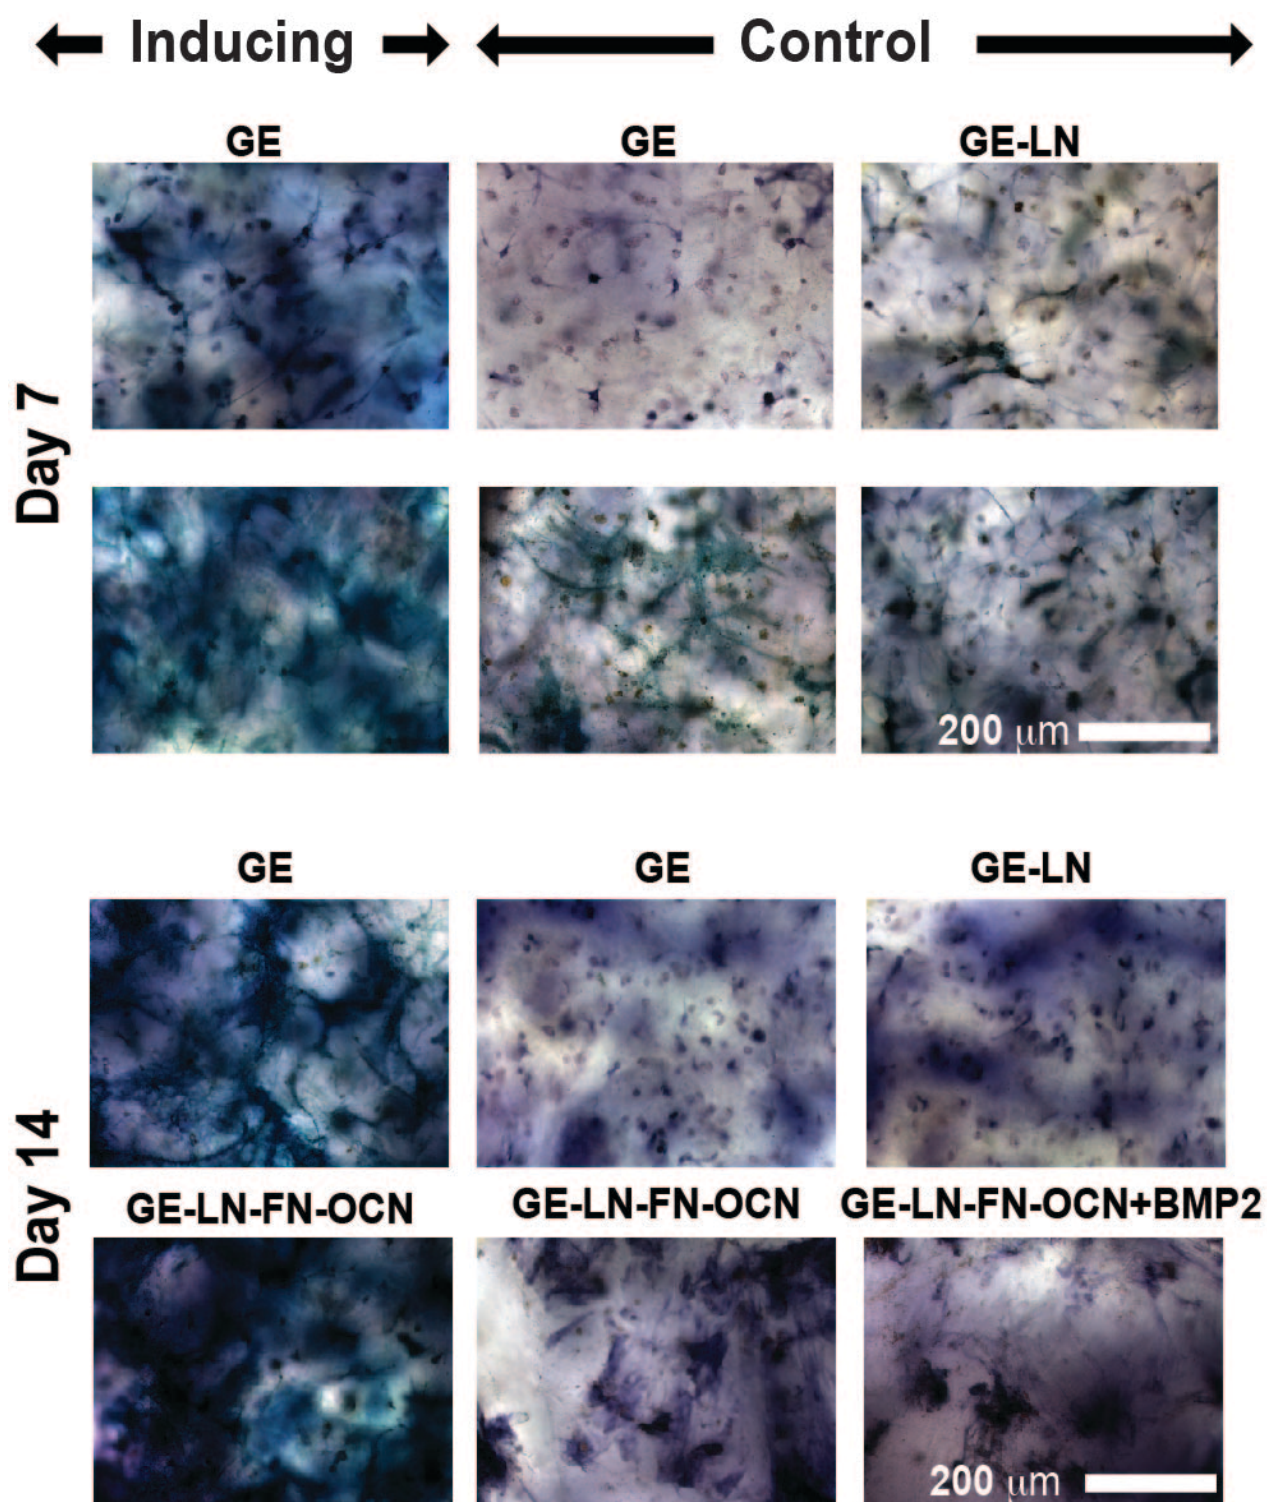

**Supplementary Figure 3:** Representative high-magnification images of ALP stained gels in Figure 4(a).

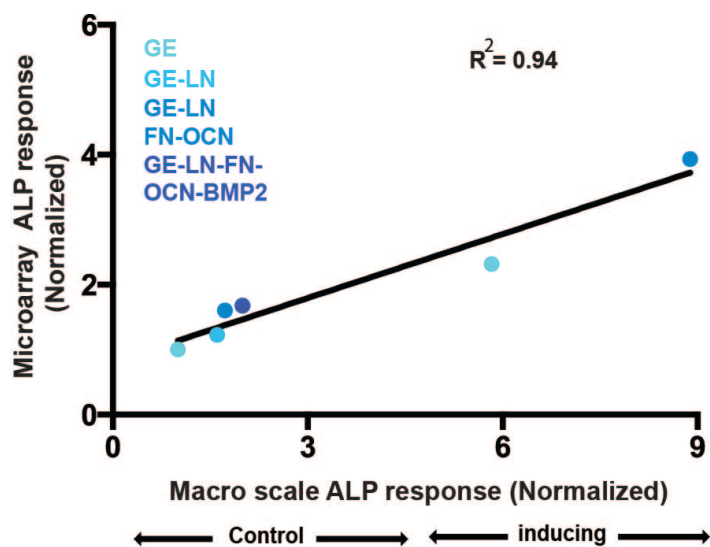

**Supplementary Figure 4:** Linear correlation between the ALP expression of microarray platform and macroscale constructs.

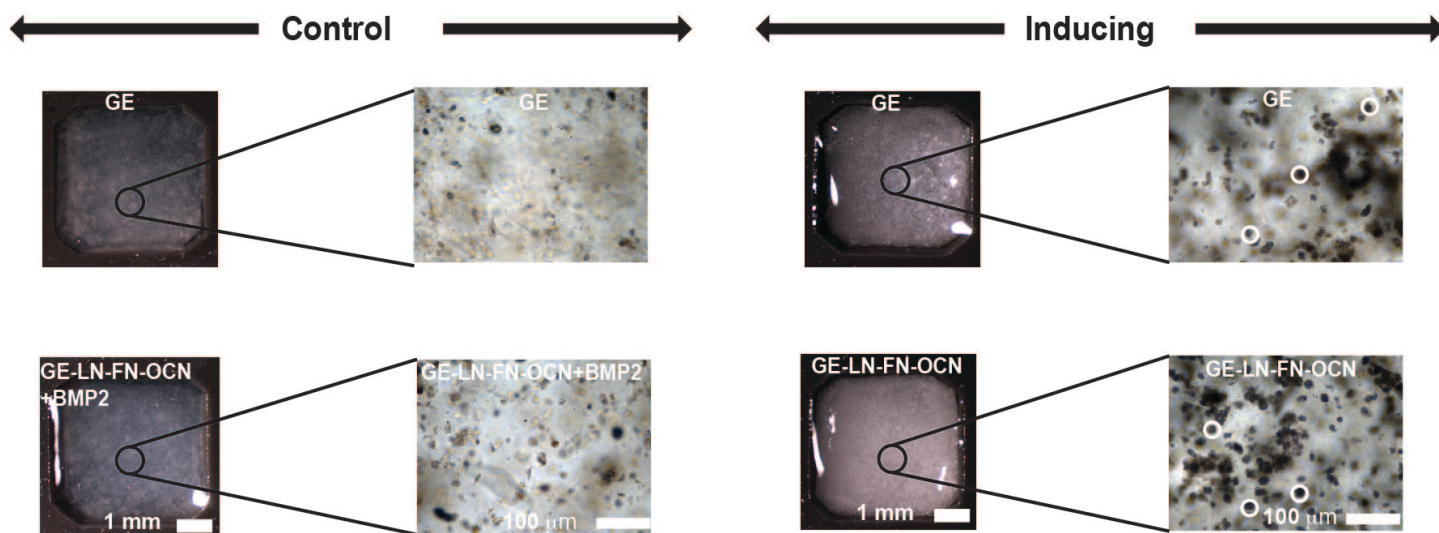

**Supplementary Figure 5:** Bright field images of the calcified hydrogels constructs cultured in control and inducing media.
